# Supplementary material for: Dinuclear anthracene-containing alkynylplatinum(ii) terpyridine complexes with photo-modulated self-assembly behaviors
Source: Royal Society of Chemistry journal article supplement (doi:10.1039/d0qm00972e), 2021-01-01
Supplement: d0qm00972e1.pdf [file d0qm00972e1.pdf]

## **Supplementary Information for**

### **Dinuclear Anthracene-Containing Alkynylplatinum(II) Terpyridine Complexes with Photo-Modulated Self-Assembly Behaviors**

Shishi Fang, Michael Ho-Yeung Chan, and Vivian Wing-Wah Yam\*

Institute of Molecular Functional Materials and Department of Chemistry, The University of  
Hong Kong, Pokfulam Road, Hong Kong (P. R. China)

E-mail: [wwyam@hku.hk](mailto:wwyam@hku.hk); Fax: (852) 28571586; Tel: (852) 28592153

## Experimental Section

**Materials and Reagents.** Potassium tetrachloroplatinate(II) ( $K_2[PtCl_4]$ ) was purchased from Chem. Pur., 98%. Dimethyl sulfoxide (Sigma-Aldrich Co. Ltd., spectrophotometric grade) for spectroscopic studies were used as received without further purification. Chloroform-*d* and DMSO-*d*<sub>6</sub> used for NMR experiments were purchased from Cambridge Isotope Laboratories, Inc. All other reagents, unless otherwise specified, were of analytical grade and were used as received. 9,10-Diethynylantracene<sup>1</sup> and  $[Pt\{tpy-C_6H_3-(alkoxy)_{2-3,5}\}Cl]OTf^2$  were prepared according to previously reported literature with slight modifications.

**Synthesis of Dinuclear Anthracene-Containing Alkynylplatinum(II) Terpyridine Complexes 1–3.** The dinuclear anthracene-containing alkynylplatinum(II) terpyridine complexes were synthesized according to modifications of procedures for the synthesis of dinuclear alkynylplatinum(II) terpyridine derivatives previously reported by Yam and coworkers in the literature.<sup>3</sup>

$[Pt\{tpy-C_6H_3-(OTEG)_{2-3,5}\}Pt\{C\equiv C-(9-Ant)-C\equiv C\}Pt\{tpy-Ph-(OTEG)_{2-3,5}\}](OTf)_2$  (**1**). To a solution of 9,10-diethynylantracene (14 mg, 0.06 mmol) and  $[Pt\{tpy-C_6H_3-(OTEG)_{2-3,5}\}Cl]OTf$  (132 mg, 0.13 mmol) in degassed dimethylformamide (30 ml) containing triethylamine (2 ml) was added a catalytic amount of CuI. The solution was stirred at room temperature in the dark under a nitrogen atmosphere overnight. After removing the solvent, the crude product was purified by the diffusion of diethyl ether vapor into a dichloromethane-chloroform mixture to give a dark green solid. Yield: 67 mg (51 %). <sup>1</sup>H NMR (500 MHz, DMSO-*d*<sub>6</sub>, 373 K):  $\delta/ppm = 3.27$  (s, 12H, -OCH<sub>3</sub>), 3.49 (s, 8H, -OCH<sub>2</sub>-), 3.59–3.66 (m, 24H, -OCH<sub>2</sub>-), 3.78 (s, 8H, -OCH<sub>2</sub>-), 4.11 (s, 8H, -OCH<sub>2</sub>-), 6.59 (s, 2H, -C<sub>6</sub>H<sub>3</sub>-), 7.30–7.35 (m, 8H,

–C<sub>6</sub>H<sub>3</sub>– and –C<sub>14</sub>H<sub>8</sub>–), 7.98 (s, 4H, tpy), 8.48–8.53 (m, 8H, tpy), 8.79 (s, 4H, tpy), 8.90 (s, 4H, –C<sub>14</sub>H<sub>8</sub>–), 9.10 (s, 4H, tpy). Positive HR-ESI-MS: calcd for [C<sub>88</sub>H<sub>94</sub>N<sub>6</sub>O<sub>16</sub>Pt<sub>2</sub>]<sup>2+</sup> *m/z* = 940.3011; found: 940.2981 [M]<sup>2+</sup>; elemental analysis calcd (%) for C<sub>90</sub>H<sub>94</sub>F<sub>6</sub>N<sub>6</sub>O<sub>22</sub>Pt<sub>2</sub>S<sub>2</sub>•CH<sub>2</sub>Cl<sub>2</sub>: C 48.26, H 4.27, N 3.71; found: C 48.20, H 4.37, N 3.85.

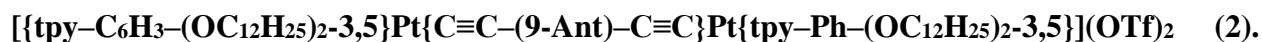

The titled complex was synthesized according to the procedure similar to that described for the preparation of **1**, except that [Pt{tpy–C<sub>6</sub>H<sub>3</sub>–(OC<sub>12</sub>H<sub>25</sub>)<sub>2</sub>-3,5}Cl]OTf (137 mg, 0.13 mmol) was used in place of [Pt{tpy–C<sub>6</sub>H<sub>3</sub>–(OTEG)<sub>2</sub>-3,5}Cl]OTf. The product was isolated as a dark green solid. Yield: 71 mg (52 %). <sup>1</sup>H NMR (500 MHz, DMSO-*d*<sub>6</sub>, 373 K): δ/ppm = 0.88 (s, 12H, –CH<sub>3</sub>), 1.29–1.42 (m, 72H, –CH<sub>2</sub>–), 1.70 (s, 8H, –CH<sub>2</sub>–), 3.92 (s, 8H, –OCH<sub>2</sub>–), 6.46 (s, 2H, –C<sub>6</sub>H<sub>3</sub>–), 7.22–7.29 (m, 8H, –C<sub>6</sub>H<sub>3</sub>– and –C<sub>14</sub>H<sub>8</sub>–), 7.96 (s, 4H, tpy), 8.39 (s, 4H, tpy), 8.50 (s, 4H, tpy), 8.79 (d, *J* = 5.5 Hz, 4H, tpy), 8.87 (s, 4H, –C<sub>14</sub>H<sub>8</sub>–), 9.03 (s, 4H, tpy). Positive HR-ESI-MS: calcd for [C<sub>108</sub>H<sub>134</sub>N<sub>6</sub>O<sub>4</sub>Pt<sub>2</sub>]<sup>2+</sup> *m/z* = 984.4881; found: 984.4915 [M]<sup>2+</sup>; elemental analysis calcd (%) for C<sub>110</sub>H<sub>134</sub>F<sub>6</sub>N<sub>6</sub>O<sub>10</sub>Pt<sub>2</sub>S<sub>2</sub>•CHCl<sub>3</sub>: C 55.83, H 5.70, N 3.52; found: C 55.64, H 5.75, N 3.59.

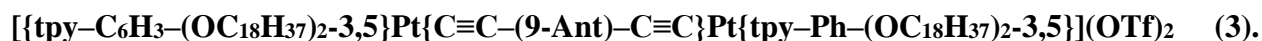

The titled complex was synthesized according to the procedure similar to that described for the preparation of **1**, except that [Pt{tpy–C<sub>6</sub>H<sub>3</sub>–(OC<sub>18</sub>H<sub>37</sub>)<sub>2</sub>-3,5}Cl]-OTf (159 mg, 0.13 mmol) was used in place of [Pt{tpy–C<sub>6</sub>H<sub>3</sub>–(OTEG)<sub>2</sub>-3,5}Cl]OTf. The product was isolated as a dark green solid. Yield: 80 mg (51 %). <sup>1</sup>H NMR (500 MHz, DMSO-*d*<sub>6</sub>, 373 K): δ/ppm = 0.86 (t, *J* = 7.0 Hz, 12H, –CH<sub>3</sub>), 1.26–1.39 (m, 112H, –CH<sub>2</sub>–), 1.43–1.48 (m, 8H, –CH<sub>2</sub>–), 1.72–1.76 (m, 8H, –CH<sub>2</sub>–), 4.02 (s, 8H, –OCH<sub>2</sub>–), 6.58 (s, 2H, –C<sub>6</sub>H<sub>3</sub>–), 7.28 (s, 4H, –C<sub>14</sub>H<sub>8</sub>–), 7.45 (s, 4H, –C<sub>6</sub>H<sub>3</sub>–), 7.99 (t, *J* = 7.0 Hz, 4H, tpy), 8.53–8.60 (m, 8H, tpy), 8.86 (d, *J* = 8.0 Hz, 4H, tpy), 8.94 (s, 4H, –C<sub>14</sub>H<sub>8</sub>–), 9.19 (s, 4H, tpy). Positive HR-ESI-MS: calcd for [C<sub>132</sub>H<sub>182</sub>N<sub>6</sub>O<sub>4</sub>Pt<sub>2</sub>]<sup>2+</sup> *m/z* = 1152.6759;

found: 1152.6737 [M]<sup>2+</sup>; elemental analysis calcd (%) for C<sub>134</sub>H<sub>182</sub>F<sub>6</sub>N<sub>6</sub>O<sub>10</sub>Pt<sub>2</sub>S<sub>2</sub>•0.5CH<sub>2</sub>Cl<sub>2</sub>: C 61.01, H 6.97, N 3.17; found: C 60.91, H 7.01, N 3.26.

**Photophysical Measurements and Instrumentation.** <sup>1</sup>H NMR spectra were recorded on a Bruker Ascend 500 (500 MHz) Fourier-transform NMR spectrometer with chemical shifts reported relative to tetramethylsilane, (CH<sub>3</sub>)<sub>4</sub>Si. Positive-ion high-resolution electrospray ionization (HR-ESI) mass spectra were recorded on a Bruker maXis II High Resolution Liquid Chromatography Quadrupole-Time of Flight (LC-QTOF) spectrometer. Elemental analyses were performed with a Carlo Erba 1106 elemental analyzer at the Institute of Chemistry, Chinese Academy of Sciences, Beijing, P. R. China. UV–Vis absorption spectra for variable concentration and temperature measurements were recorded using a Varian Cary 50 UV–vis spectrophotometer. The temperature was maintained by a Varian Cary single cell Peltier thermostat. UV–Vis absorption spectral changes during photoirradiation were recorded on a Cary 8454 spectrophotometer. Photoirradiations were carried out with a 300 W Oriel Corporation Model 60011 Xe (ozone-free) lamp with an Applied Photophysics F 3.4 monochromator to select the monochromatic light. Transmission electron microscopy (TEM) experiments were performed on a Philips CM100 TEM equipped with a TENGRA 2.3 K × 2.3 K camera for digital imaging, while the selected area electron diffraction (SAED) experiments were performed on a FEI Tecnai G2 20 S-TWIN transmission electron microscope with an accelerating voltage of 200 kV. Scanning electron microscopy (SEM) experiments were performed on a Hitachi S4800 FEG SEM. Dynamic light scattering (DLS) was measured with a Malvern Zetasizer Nano ZS90 equipped with an internal HeNe laser (633.0 nm) at different temperatures. All measurements were conducted at room temperature unless specified otherwise.

**Isodesmic Model in Curve Fitting.** The isodesmic model<sup>4</sup> developed by Meijer and coworkers has been applied to fit the melting curves obtained in the temperature-dependent UV–vis spectroscopic studies for complexes **1–3** in DMSO solutions. A slow cooling rate of 0.5 K min<sup>-1</sup> was applied for all melting curves to ensure that the self-assembly processes were under thermodynamic control.<sup>5–7</sup> The self-assembly process can be described as isodesmic growth mechanism if every monomer addition to the supramolecular polymer is governed by a single equilibrium constant  $K_e$ . In the isodesmic model, the degree of aggregation ( $\alpha$ ) is related to the absolute temperature  $T$  by equation (1) as shown below. The melting temperature  $T_m$  is defined as the temperature when  $\alpha = 0.5$ , while the enthalpy change  $\Delta H$  corresponds to the formation of non-covalent interactions during the aggregation process.  $R$  is the ideal gas constant.

$$\alpha(T) = \frac{1}{1 + \exp\left[-0.908\Delta H \frac{T - T_m}{RT_m^2}\right]} \quad \text{eqn. (1)}$$

The equation above could be applied to fit the experimental data of UV–vis absorption spectra at various temperatures so that the  $\Delta H$  and  $T_m$  could be obtained. In addition, the average stack length  $DP_N$  and the equilibrium constant  $K_e$  can be obtained by equation (2) with known concentration  $c$ .

$$DP_N = \frac{1}{\sqrt{1 - \alpha(T)}} = \frac{1}{2} + \frac{1}{2}\sqrt{4K_e(T)c + 1} \quad \text{eqn. (2)}$$

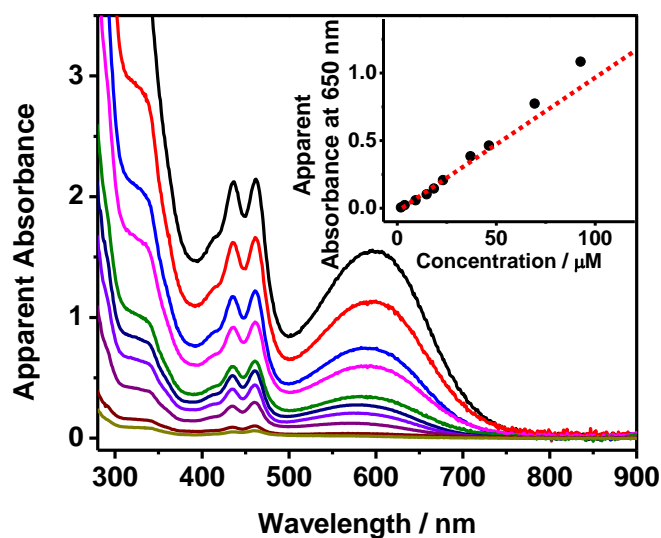

**Figure S1.** Concentration-dependent UV-vis absorption spectra of complex **2** in DMSO solution in the concentration range of  $1.85 \times 10^{-6}$  to  $9.26 \times 10^{-5}$  M. Inset: A plot of apparent absorbance against concentration, monitored at 650 nm. The apparent absorbance values were obtained by correcting to 1-cm path length equivalence.

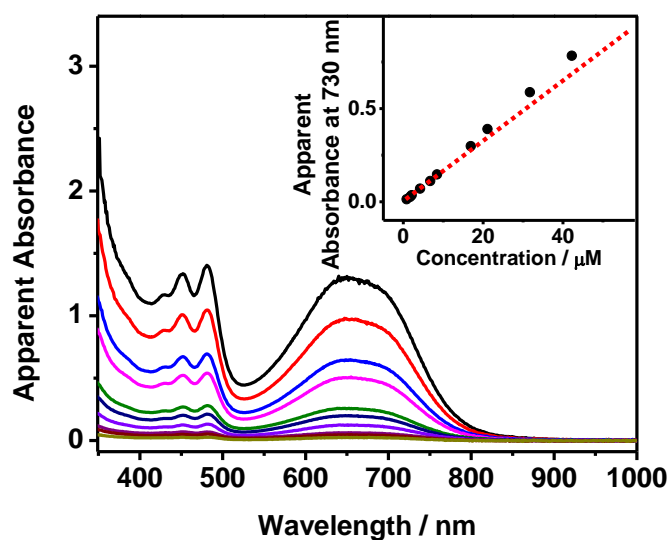

**Figure S2.** Concentration-dependent UV-vis absorption spectra of complex **3** in DMSO solution in the concentration range of  $8.44 \times 10^{-7}$  to  $4.22 \times 10^{-5}$  M. Inset: A plot of apparent absorbance against concentration, monitored at 730 nm. The apparent absorbance values were obtained by correcting to 1-cm path length equivalence.

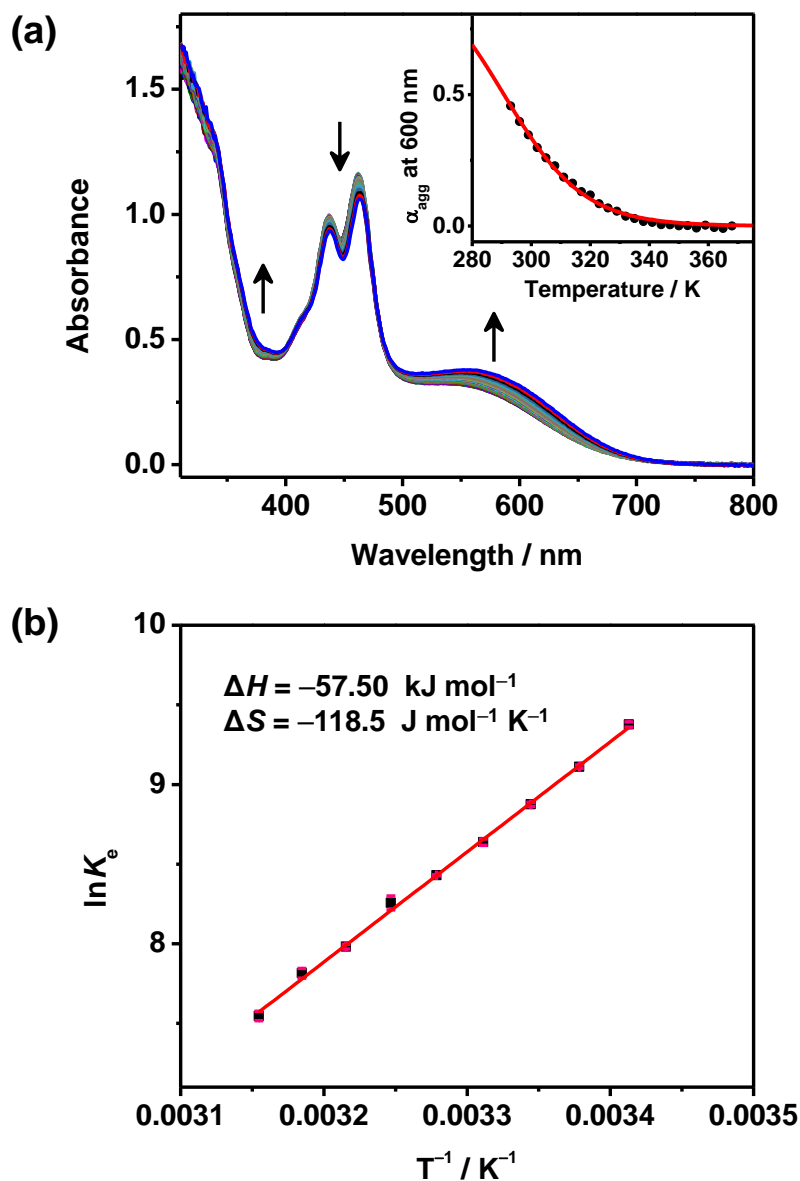

**Figure S3.** (a) UV-Vis absorption spectral traces of complex **1** in DMSO solution upon cooling from 368 to 293 K at a rate of 0.5 K min<sup>-1</sup>. Inset: A plot of the degree of aggregation at 600 nm as a function of temperature with the curve fitted to the temperature-dependent isodesmic model. (b) Van't Hoff plot of the equilibrium constant  $K_e$  at various temperatures with the corresponding thermodynamic parameters.

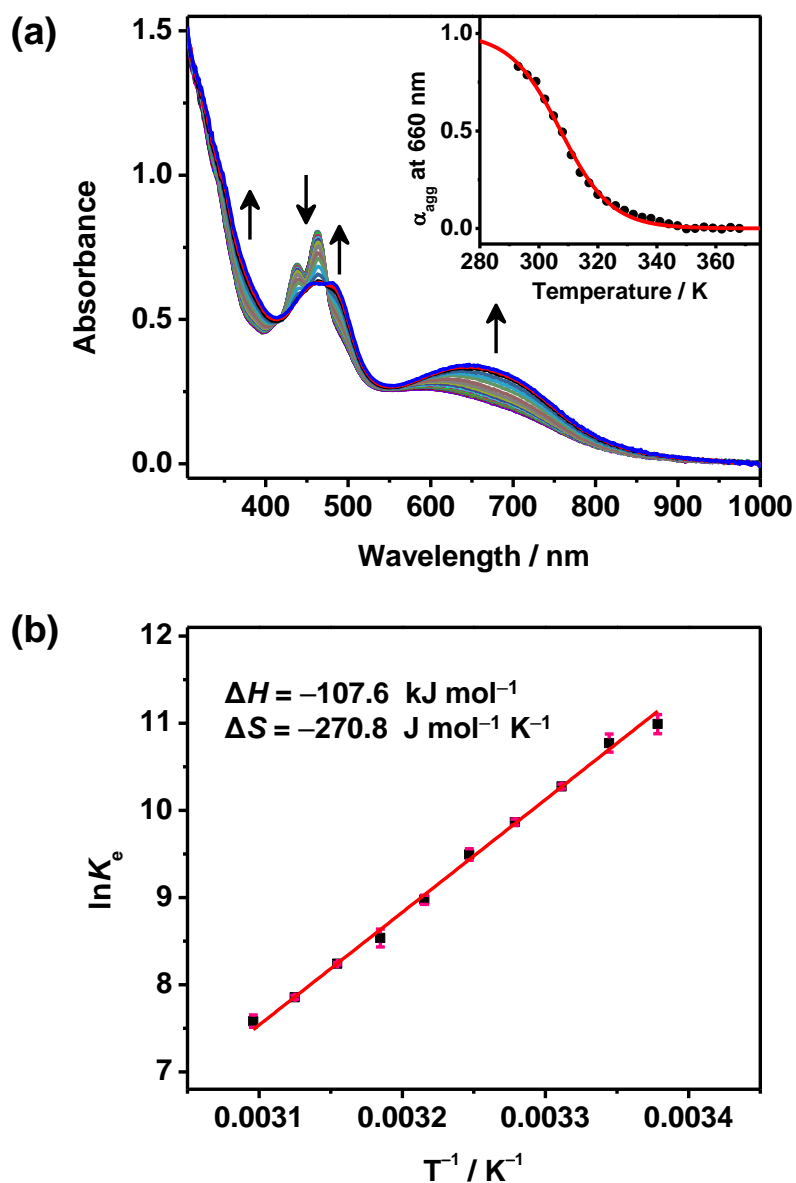

**Figure S4.** (a) UV–Vis absorption spectral traces of complex **3** in DMSO solution upon cooling from 368 to 293 K at a rate of 0.5 K min<sup>-1</sup>. Inset: A plot of the degree of aggregation at 660 nm as a function of temperature with the curve fitted to the temperature-dependent isodesmic model. (b) Van’t Hoff plot of the equilibrium constant  $K_e$  at various temperatures with the corresponding thermodynamic parameters.



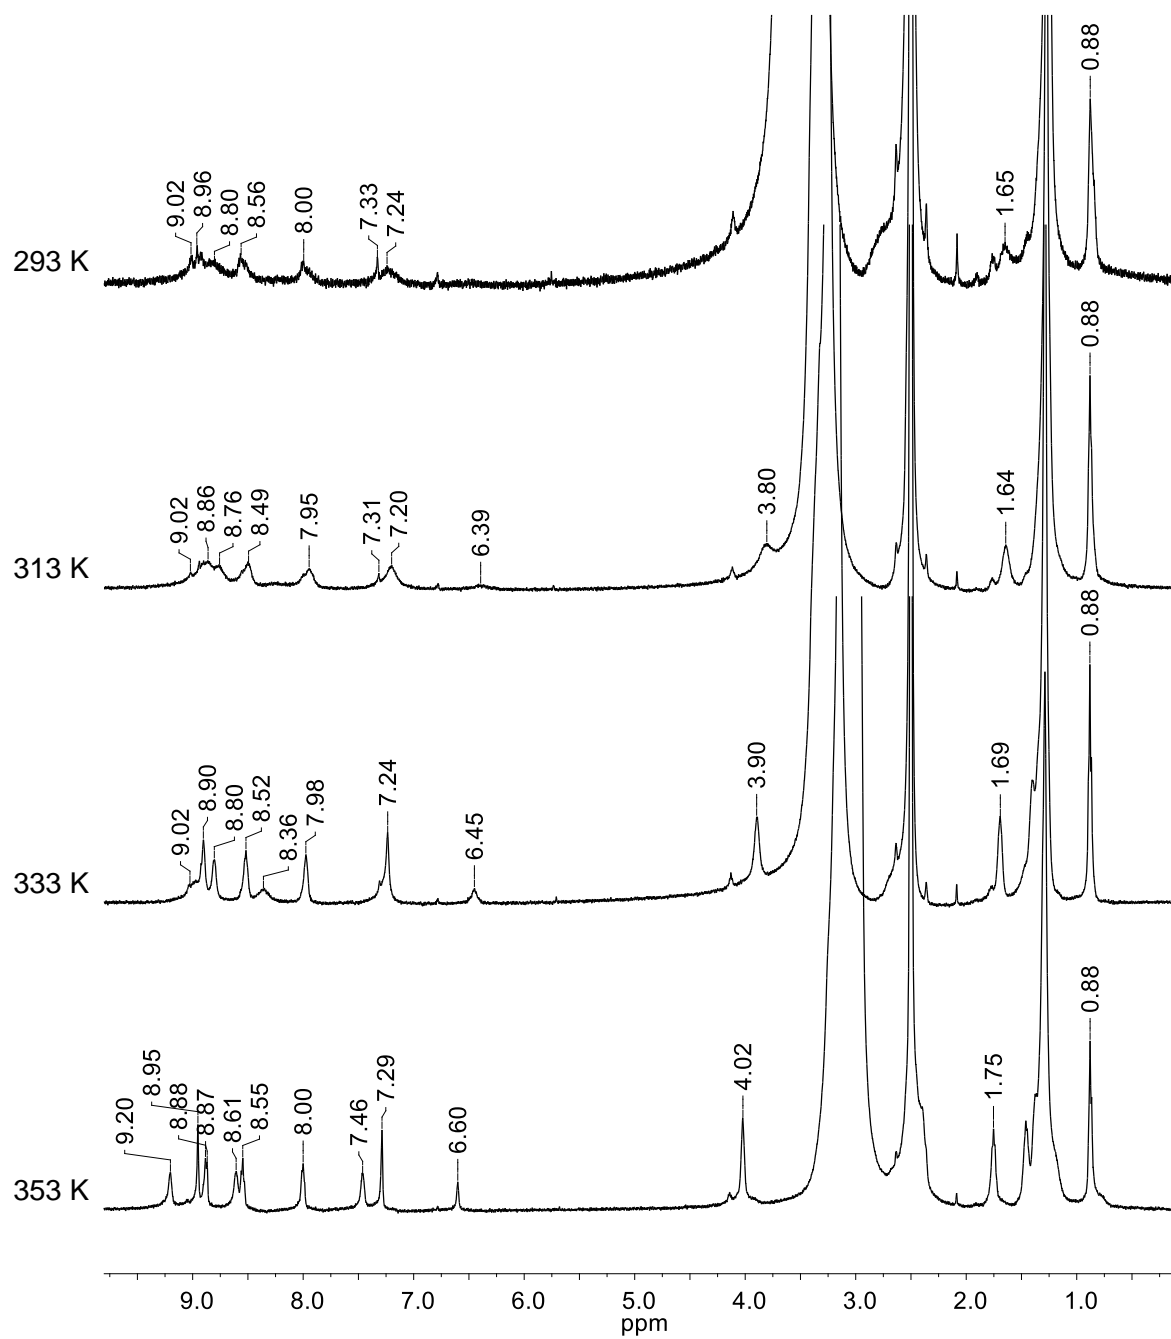

**Figure S5.**  $^1\text{H}$  NMR spectra of complex **2** in  $\text{DMSO-}d_6$  solution upon increasing temperature from 293 K to 353 K.

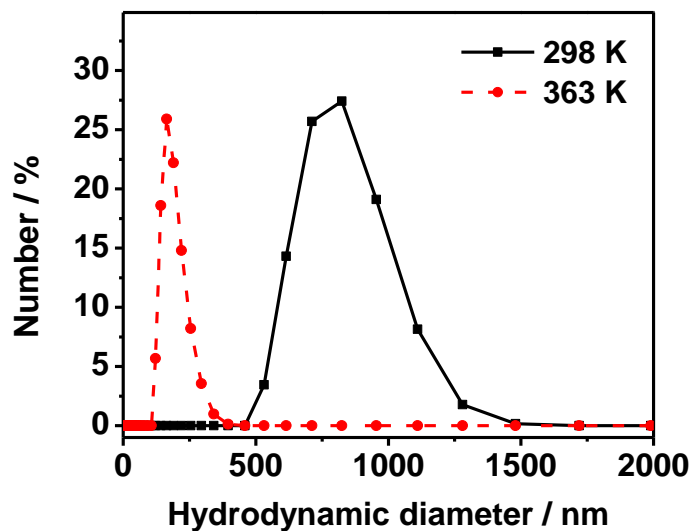

**Figure S6.** DLS data of complex **3** in DMSO solution at 298 K and 363 K, with the hydrodynamic diameters of *ca.* 860 nm and 210 nm, respectively.

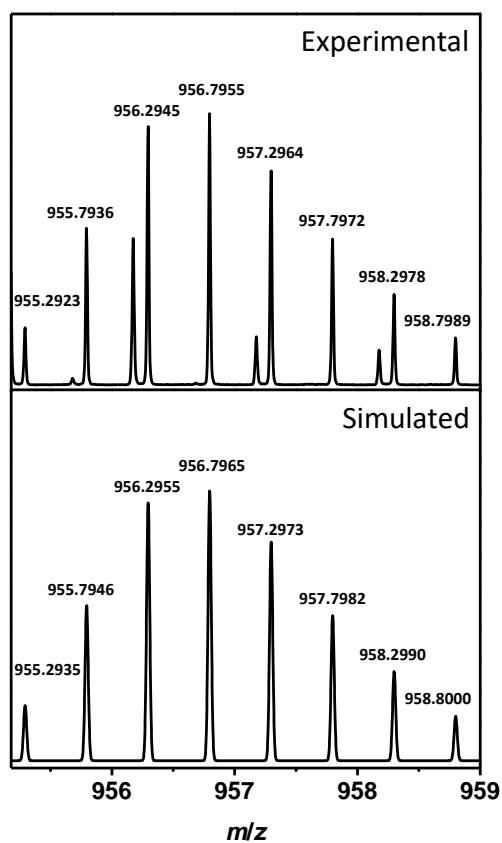

**Figure S7.** HR-ESI-MS showing the corresponding endoperoxide  $[M+2O]^{2+}$  of complex **1** after photoirradiation and the corresponding simulated isotopic pattern.

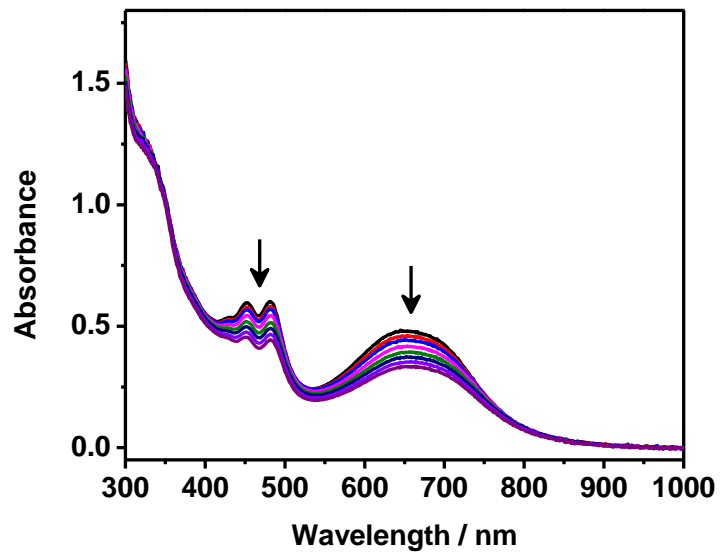

**Figure S8.** UV-Vis absorption spectral changes of complex **3** in DMSO solution upon photoirradiation at 365 nm at 298 K.

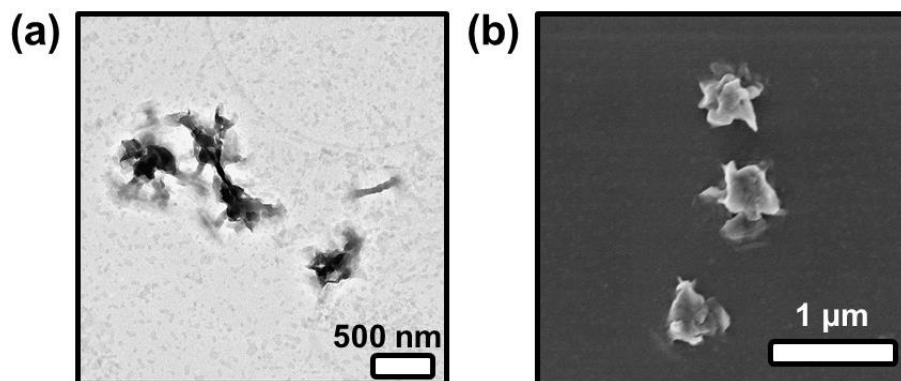

**Figure S9.** (a) A TEM image and (b) an SEM image of complex **3** prepared from a DMSO solution after photoirradiation.

**Table S1.** Electronic absorption data of complexes **1–3** in DMSO solutions

| Complex                                                                                                                                                                                                                                             | Temperature / K | Absorption                                                                                     |
|-----------------------------------------------------------------------------------------------------------------------------------------------------------------------------------------------------------------------------------------------------|-----------------|------------------------------------------------------------------------------------------------|
|                                                                                                                                                                                                                                                     |                 | $\lambda_{\max}$ / nm ( $\epsilon$ / $\text{dm}^3 \text{mol}^{-1} \text{cm}^{-1}$ )            |
| [ $\{\text{tpy-C}_6\text{H}_3\text{-(OTEG)}_{2-3,5}\}\text{Pt-}\{\text{C}\equiv\text{C-(9-Ant)-C}\equiv\text{C}\}\text{Pt}\{\text{tpy-C}_6\text{H}_3\text{-(OTEG)}_{2-3,5}\}\text{Pt}\}(\text{OTf})_2$ ( <b>1</b> )                                 | 298             | 315sh (43200), 335sh (39600),<br>413sh (18700), 434sh (28800),<br>460sh (32400), 568 (12000)   |
|                                                                                                                                                                                                                                                     | 368             | 314sh (41400), 339sh (36500),<br>413sh (18300), 434sh (30900),<br>460sh (37300), 549 (9640)    |
| [ $\{\text{tpy-C}_6\text{H}_3\text{-(OC}_{12}\text{H}_{25})_{2-3,5}\}\text{Pt-}\{\text{C}\equiv\text{C-(9-Ant)-C}\equiv\text{C}\}\text{Pt}\{\text{tpy-C}_6\text{H}_3\text{-(OC}_{12}\text{H}_{25})_{2-3,5}\}\text{Pt}\}(\text{OTf})_2$ ( <b>2</b> ) | 298             | 312sh (38100), 414sh (16100),<br>435sh (22100), 461sh (23300),<br>590 (13200)                  |
|                                                                                                                                                                                                                                                     | 368             | 312sh (37900), 337sh (31400),<br>414sh (16600), 435sh (28500),<br>460sh (34100), 553 (8520)    |
| [ $\{\text{tpy-C}_6\text{H}_3\text{-(OC}_{18}\text{H}_{37})_{2-3,5}\}\text{Pt-}\{\text{C}\equiv\text{C-(9-Ant)-C}\equiv\text{C}\}\text{Pt}\{\text{tpy-C}_6\text{H}_3\text{-(OC}_{18}\text{H}_{37})_{2-3,5}\}\text{Pt}\}(\text{OTf})_2$ ( <b>3</b> ) | 298             | 313sh (27300), 433sh (11000),<br>453sh (12200), 481sh (12000),<br>639sh (11300), 682sh (10400) |
|                                                                                                                                                                                                                                                     | 368             | 313sh (27100), 337sh (24800),<br>411sh (12300), 435sh (21200),<br>460sh (25000), 558sh (8150)  |

**Table S2.** Thermodynamic parameters for the self-assembly of complexes **1–3** in DMSO solutions

| Complex                                                                                                                                                                                                                                                 | $\Delta H /$<br>kJ mol <sup>-1</sup>       | $T_m^a /$<br>K | $K_e^a /$<br>M <sup>-1</sup> | $\Delta S^b /$<br>J mol <sup>-1</sup> K <sup>-1</sup> | $\Delta G^b /$<br>kJ mol <sup>-1</sup> | $DP_N$ |
|---------------------------------------------------------------------------------------------------------------------------------------------------------------------------------------------------------------------------------------------------------|--------------------------------------------|----------------|------------------------------|-------------------------------------------------------|----------------------------------------|--------|
| [[tpy-C <sub>6</sub> H <sub>3</sub> -(OTEG) <sub>2</sub> -<br>3,5}Pt{C≡C-(9-Ant)-<br>C≡C}Pt{tpy-C <sub>6</sub> H <sub>3</sub> -<br>(OTEG) <sub>2</sub> -3,5}]](OTf) <sub>2</sub> ( <b>1</b> )                                                           | -57.28 <sup>a</sup><br>-57.50 <sup>b</sup> | 291            | 9.06×10 <sup>3</sup>         | -118.5                                                | -22.2                                  | 1.3    |
| [[tpy-C <sub>6</sub> H <sub>3</sub> -(OC <sub>12</sub> H <sub>25</sub> ) <sub>2</sub> -<br>3,5}Pt{C≡C-(9-Ant)-<br>C≡C}Pt{tpy-C <sub>6</sub> H <sub>3</sub> -<br>(OC <sub>12</sub> H <sub>25</sub> ) <sub>2</sub> -3,5}]](OTf) <sub>2</sub> ( <b>2</b> ) | -77.72 <sup>a</sup><br>-75.86 <sup>b</sup> | 305            | 3.49×10 <sup>4</sup>         | -169.0                                                | -25.5                                  | 1.8    |
| [[tpy-C <sub>6</sub> H <sub>3</sub> -(OC <sub>18</sub> H <sub>37</sub> ) <sub>2</sub> -<br>3,5}Pt{C≡C-(9-Ant)-<br>C≡C}Pt{tpy-C <sub>6</sub> H <sub>3</sub> -<br>(OC <sub>18</sub> H <sub>37</sub> ) <sub>2</sub> -3,5}]](OTf) <sub>2</sub> ( <b>3</b> ) | -101.2 <sup>a</sup><br>-107.6 <sup>b</sup> | 307            | 5.93×10 <sup>4</sup>         | -270.8                                                | -26.9                                  | 2.2    |

<sup>a</sup> Determined by fitting the experimental data of the functions of normalized degree of aggregation against temperature on the basis of the temperature-dependent isodesmic model.

<sup>b</sup> Determined by the van't Hoff plot generated from the variable-temperature UV-vis absorption studies.

**Table S3.** DLS data of complex **3** in DMSO solution before and after photoirradiation at room temperature

| Sample condition        | Hydrodynamic diameter / nm |
|-------------------------|----------------------------|
| Before photoirradiation | 863.7 ± 162.7              |
| After photoirradiation  | 776.2 ± 171.2              |

## References

---

- 1 S. Yu, R. Shan, G.-Y. Sun, T. Chen, L. Wu and L. Y. Jin, Construction of various supramolecular assemblies from rod-coil molecules containing biphenyl and anthracene groups driven by donor-acceptor interactions, *ACS Appl. Mater. Interfaces*, 2018, **10**, 22529–22536.
- 2 V. W.-W. Yam, R. P.-L. Tang, K. M.-C. Wong and K.-K. Cheung, Synthesis, luminescence, electrochemistry, and ion-binding studies of platinum(II) terpyridyl acetylide complexes, *Organometallics*, 2001, **20**, 4476–4482.
- 3 K. H.-Y. Chan, H.-S. Chow, K. M.-C. Wong, M. C.-L. Yeung and V. W.-W. Yam, Towards thermochromic and thermoresponsive near-infrared (NIR) luminescent molecular materials through the modulation of inter- and/or intramolecular Pt··Pt and  $\pi$ - $\pi$  interactions, *Chem. Sci.*, 2010, **1**, 477–482.
- 4 M. M. J. Smulders, M. M. L. Nieuwenhuizen, T. F. A. de Greef, P. van der Schoot, A. P. H. J. Schenning and E. W. Meijer, How to distinguish isodesmic from cooperative supramolecular polymerisation, *Chem.–Eur. J.*, 2010, **16**, 362–367.
- 5 P. Jonkheijm, P. van der Schoot, A. P. H. J. Schenning and E. W. Meijer, Probing the solvent-assisted nucleation pathway in chemical self-assembly, *Science*, 2006, **313**, 80–83.
- 6 M. M. J. Smulders, A. P. H. J. Schenning and E. W. Meijer, Insight into the mechanisms of cooperative self-assembly: the “sergeants-and-soldiers” principle of chiral and achiral  $C_3$ -symmetrical discotic triamides, *J. Am. Chem. Soc.*, 2008, **130**, 606–611.
- 7 P. A. Korevaar, C. Schaefer, T. F. A. de Greef and E. W. Meijer, Controlling chemical self-assembly by solvent-dependent dynamics, *J. Am. Chem. Soc.*, 2012, **134**, 13482–13491.
